# Supplementary material for: Effectiveness of SNPs for Sibship Assignment in Farmed Banana Shrimp (Penaeus merguiensis)
Source: MDPI journal article supplement (doi:10.3390/jmse11071281), 2023-06-24
Supplement: s1 [file s1]

**Table S1** Composition of the 48 families

| Family ID | F   | M   | Total |
|-----------|-----|-----|-------|
| 1         | 4   | 9   | 13    |
| 2         | 6   | 6   | 12    |
| 3         | 10  | 3   | 13    |
| 4         | 3   | 9   | 12    |
| 5         | 5   | 7   | 12    |
| 6         | 6   | 6   | 12    |
| 7         | 7   | 3   | 10    |
| 8         | 6   | 6   | 12    |
| 9         | 8   | 4   | 12    |
| 10        | 4   | 8   | 12    |
| 11        | 6   | 6   | 12    |
| 12        | 6   | 6   | 12    |
| 13        | 8   | 4   | 12    |
| 14        | 6   | 6   | 12    |
| 15        | 5   | 6   | 11    |
| 16        | 3   | 1   | 4     |
| 17        | 7   | 4   | 11    |
| 18        | 6   | 6   | 12    |
| 19        | 5   | 7   | 12    |
| 20        | 6   | 6   | 12    |
| 21        | 9   | 3   | 12    |
| 22        | 5   | 7   | 12    |
| 23        | 7   | 5   | 12    |
| 24        | 5   | 8   | 13    |
| 25        | 7   | 5   | 12    |
| 26        | 7   | 5   | 12    |
| 27        | 6   | 5   | 11    |
| 28        | 9   | 3   | 12    |
| 29        | 5   | 7   | 12    |
| 30        | 8   | 4   | 12    |
| 31        | 3   | 6   | 9     |
| 32        | 4   | 8   | 12    |
| 33        | 5   | 7   | 12    |
| 34        | 6   | 6   | 12    |
| 35        | 7   | 5   | 12    |
| 36        | 3   | 9   | 12    |
| 37        | 5   | 7   | 12    |
| 38        | 4   | 6   | 10    |
| 39        | 8   | 4   | 12    |
| 40        | 6   | 6   | 12    |
| 41        | 7   | 5   | 12    |
| 42        | 7   | 4   | 11    |
| 43        | 9   | 3   | 12    |
| 44        | 5   | 7   | 12    |
| 45        | 5   | 7   | 12    |
| 46        | 6   | 6   | 12    |
| 47        | 8   | 5   | 13    |
| 48        | 6   | 7   | 13    |
| Total     | 289 | 273 | 562   |
