# Supplementary material for: Effectiveness of SNPs for Sibship Assignment in Farmed Banana Shrimp (Penaeus merguiensis)
Source: MDPI journal article supplement (doi:10.3390/jmse11071281), 2023-06-24
Supplement: s1 [file s1]

**Table S2** Sibship assignments using SNPs with different minor allele frequencies, numbers and genotyping error rates

| N <sub>SNP</sub> | Average MAF       |                   |                   |                   |                   |                   |
|------------------|-------------------|-------------------|-------------------|-------------------|-------------------|-------------------|
|                  | 0.02<br>(MAF0.02) | 0.07<br>(MAF0.07) | 0.14<br>(MAF0.14) | 0.24<br>(MAF0.24) | 0.35<br>(MAF0.35) | 0.45<br>(MAF0.45) |
| 50               | ✓                 | ✓                 | ✓                 | ✓                 | ✓                 | ✓                 |
| 91               | ✓                 | ✓                 | ✓ *               | ✓                 | ✓                 | ✓                 |
| 150              | ✓                 | ✓                 | ✓                 | ✓                 | -                 | -                 |
| 200              | -                 | -                 | ✓ *               | -                 | -                 | -                 |

Sibship assignments assumed genotyping error rate at 0.05 per locus, except for ones with asterisk (\*) for additional genotyping error rates at 0.0001, 0.001, 0.01 and 0.1 per locus.
